# Supplementary material
Source: PubMed Central journal article supplement (PMC4461145)

## Supporting Information

### Total synthesis of (–)-kopsinine and *ent*-(+)-kopsinine

Kiyoun Lee and Dale L. Boger\*

*Department of Chemistry and the Skaggs Institute for Chemical Biology, The Scripps Research Institute,  
10550 North Torrey Pines Road, La Jolla, California 92037*

| Contents                                       | Page Number |
|------------------------------------------------|-------------|
| Copies of $^1\text{H}$ and $^{13}\text{C}$ NMR | S2–S22      |

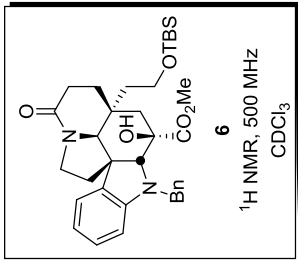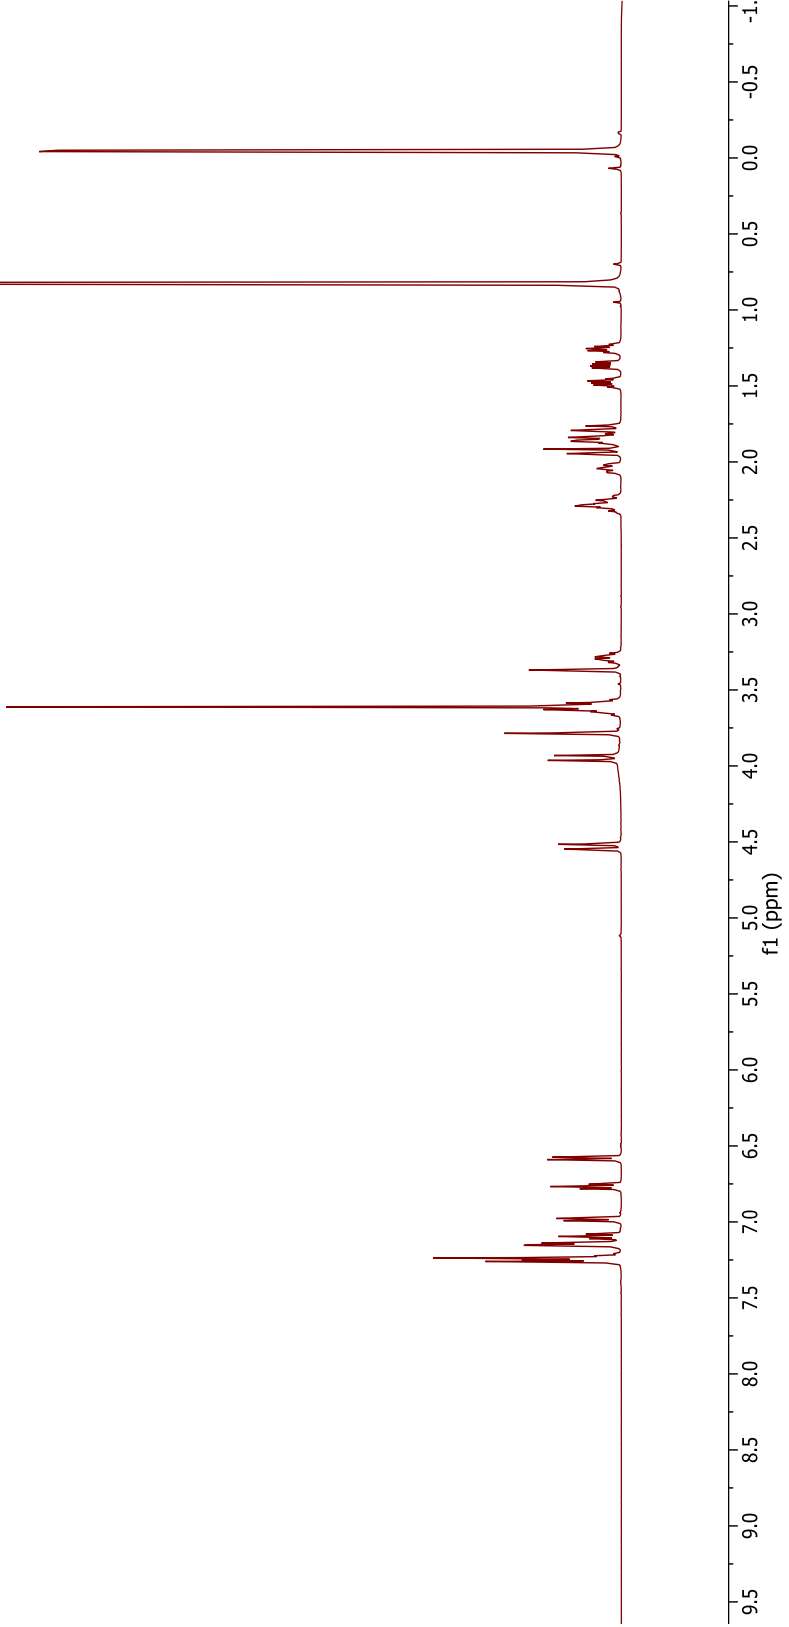

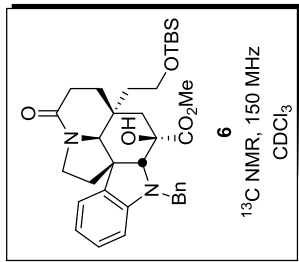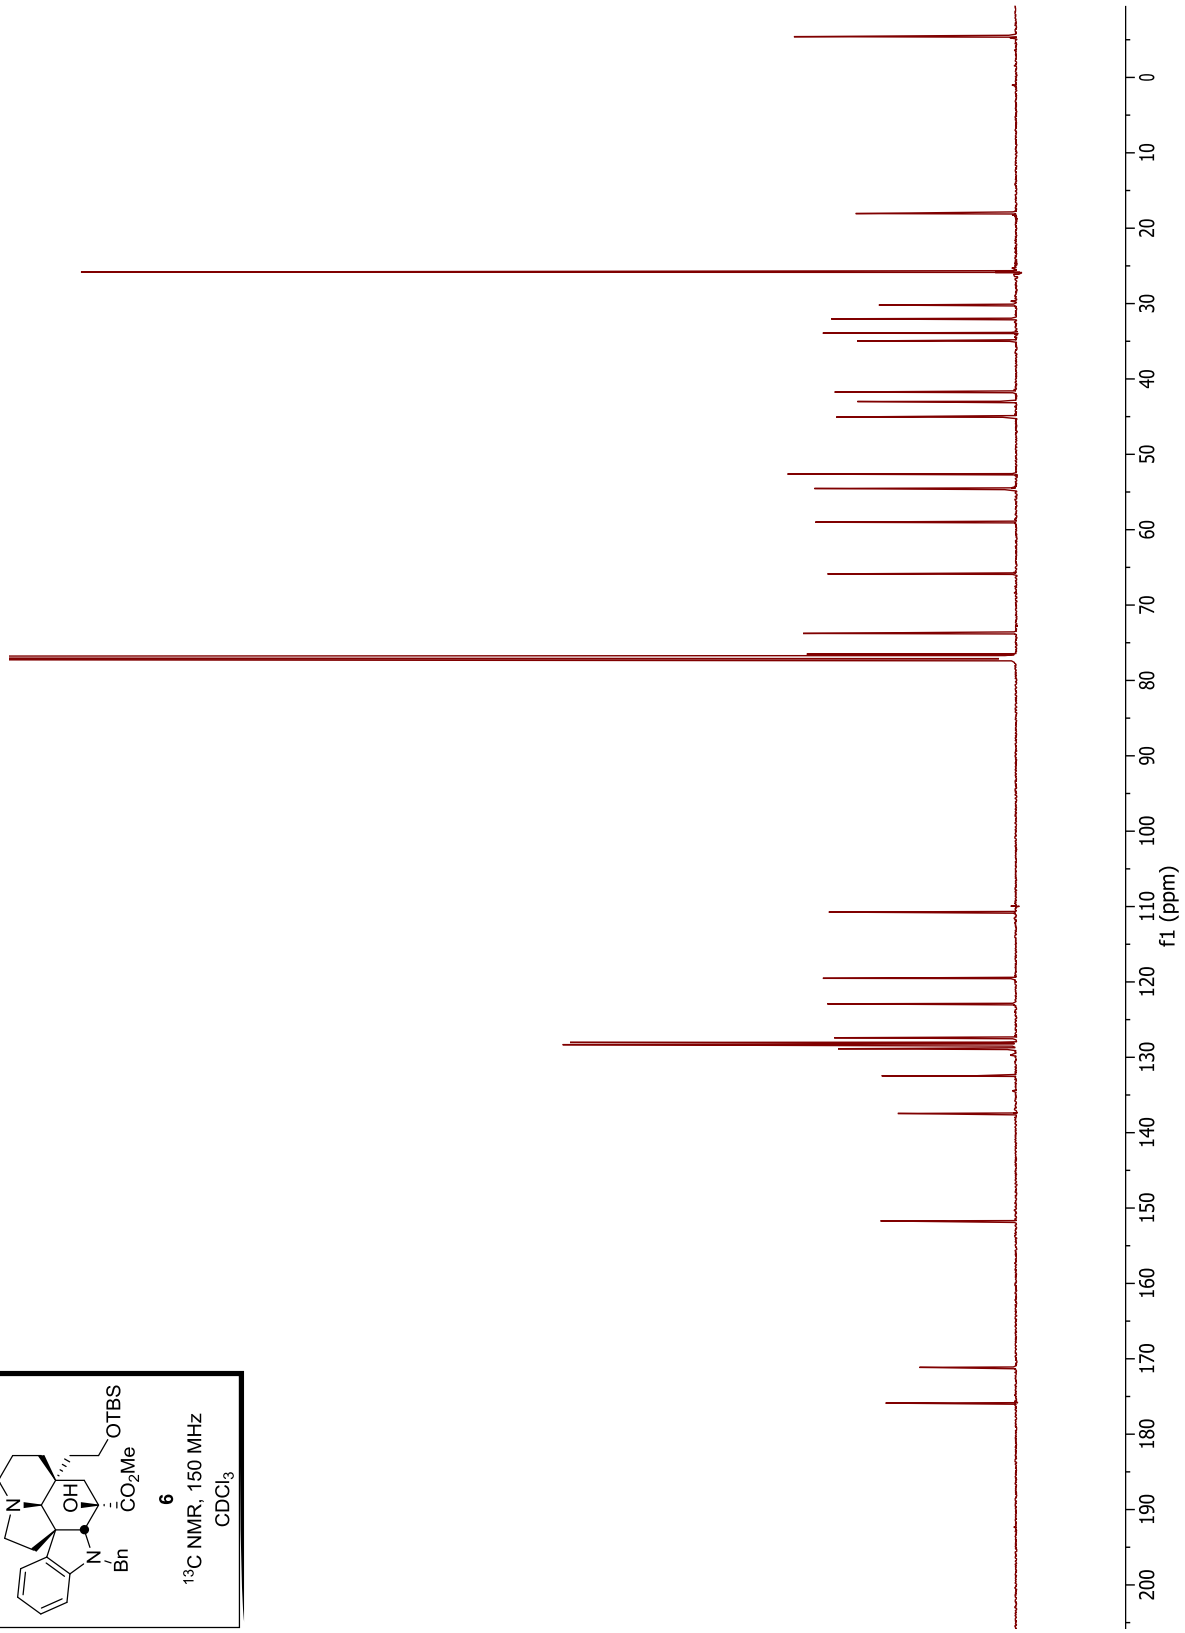

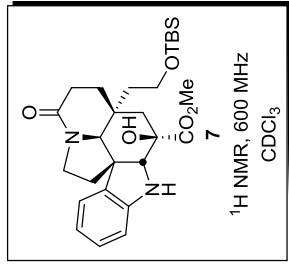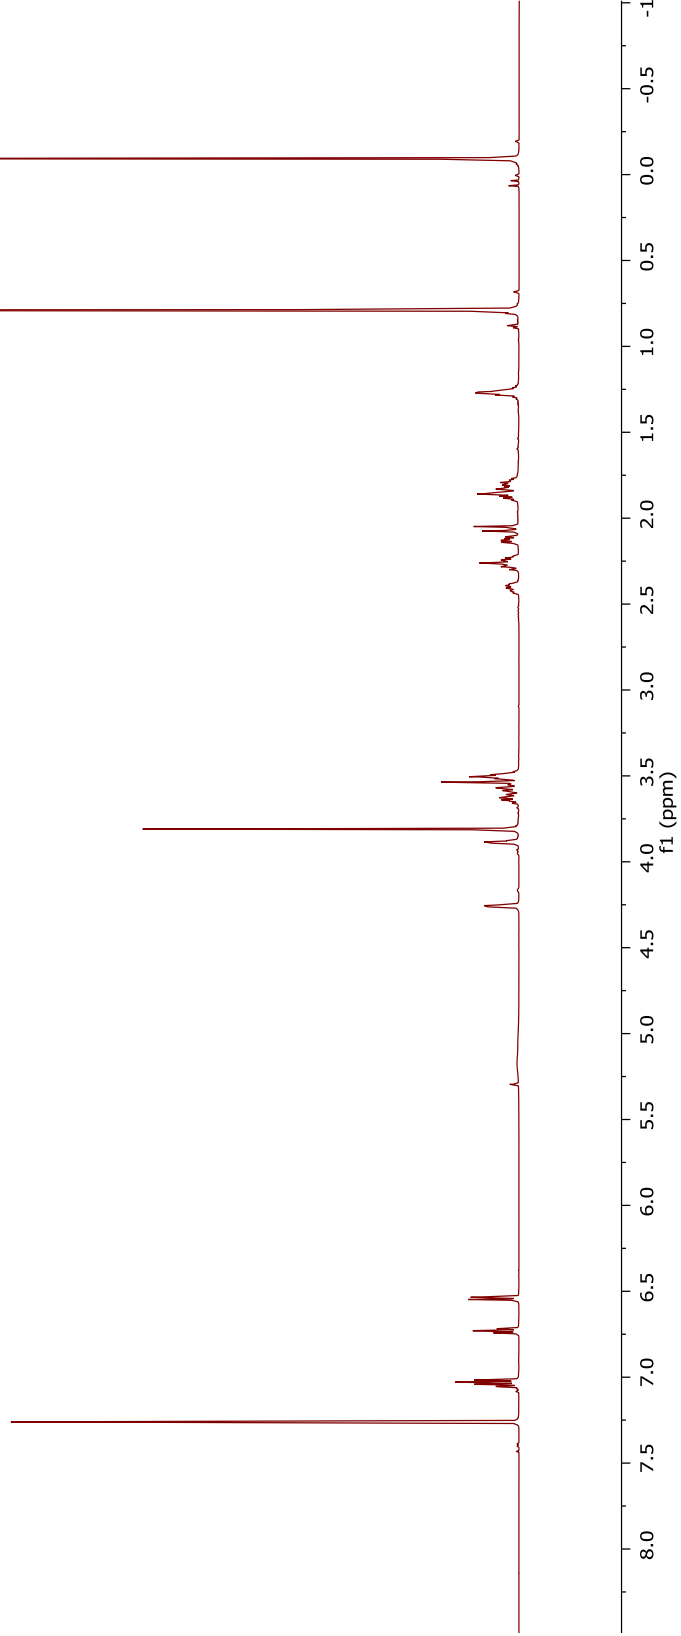

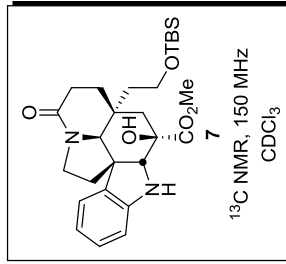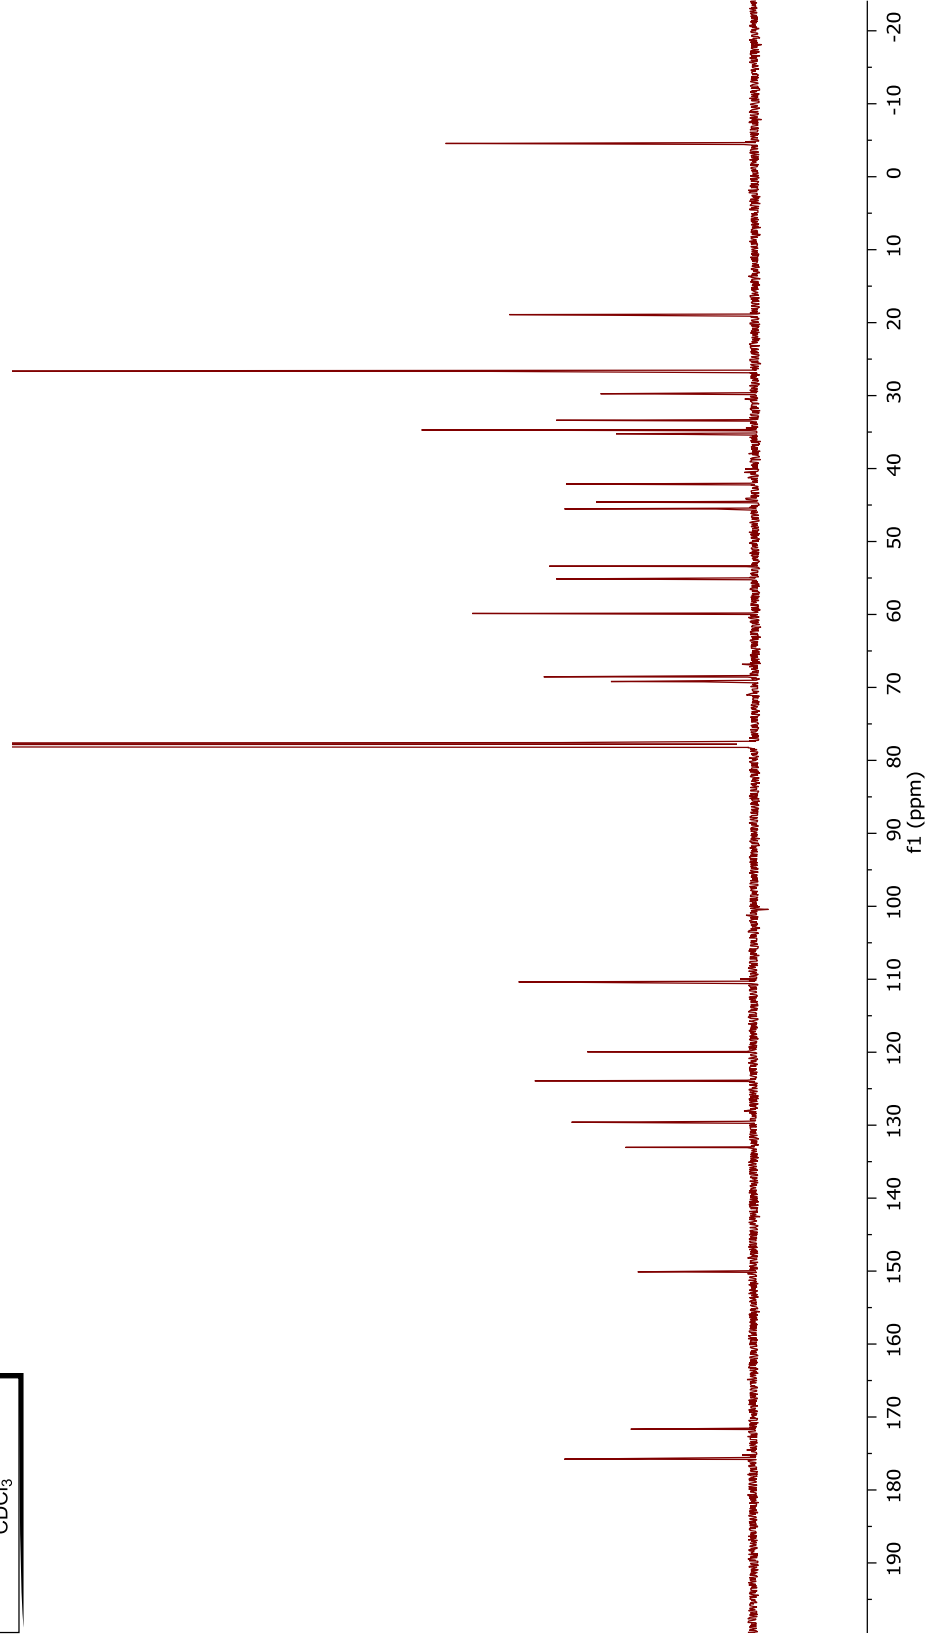

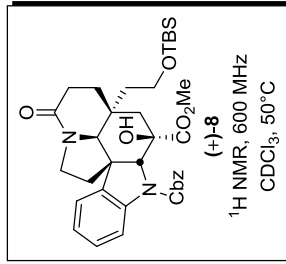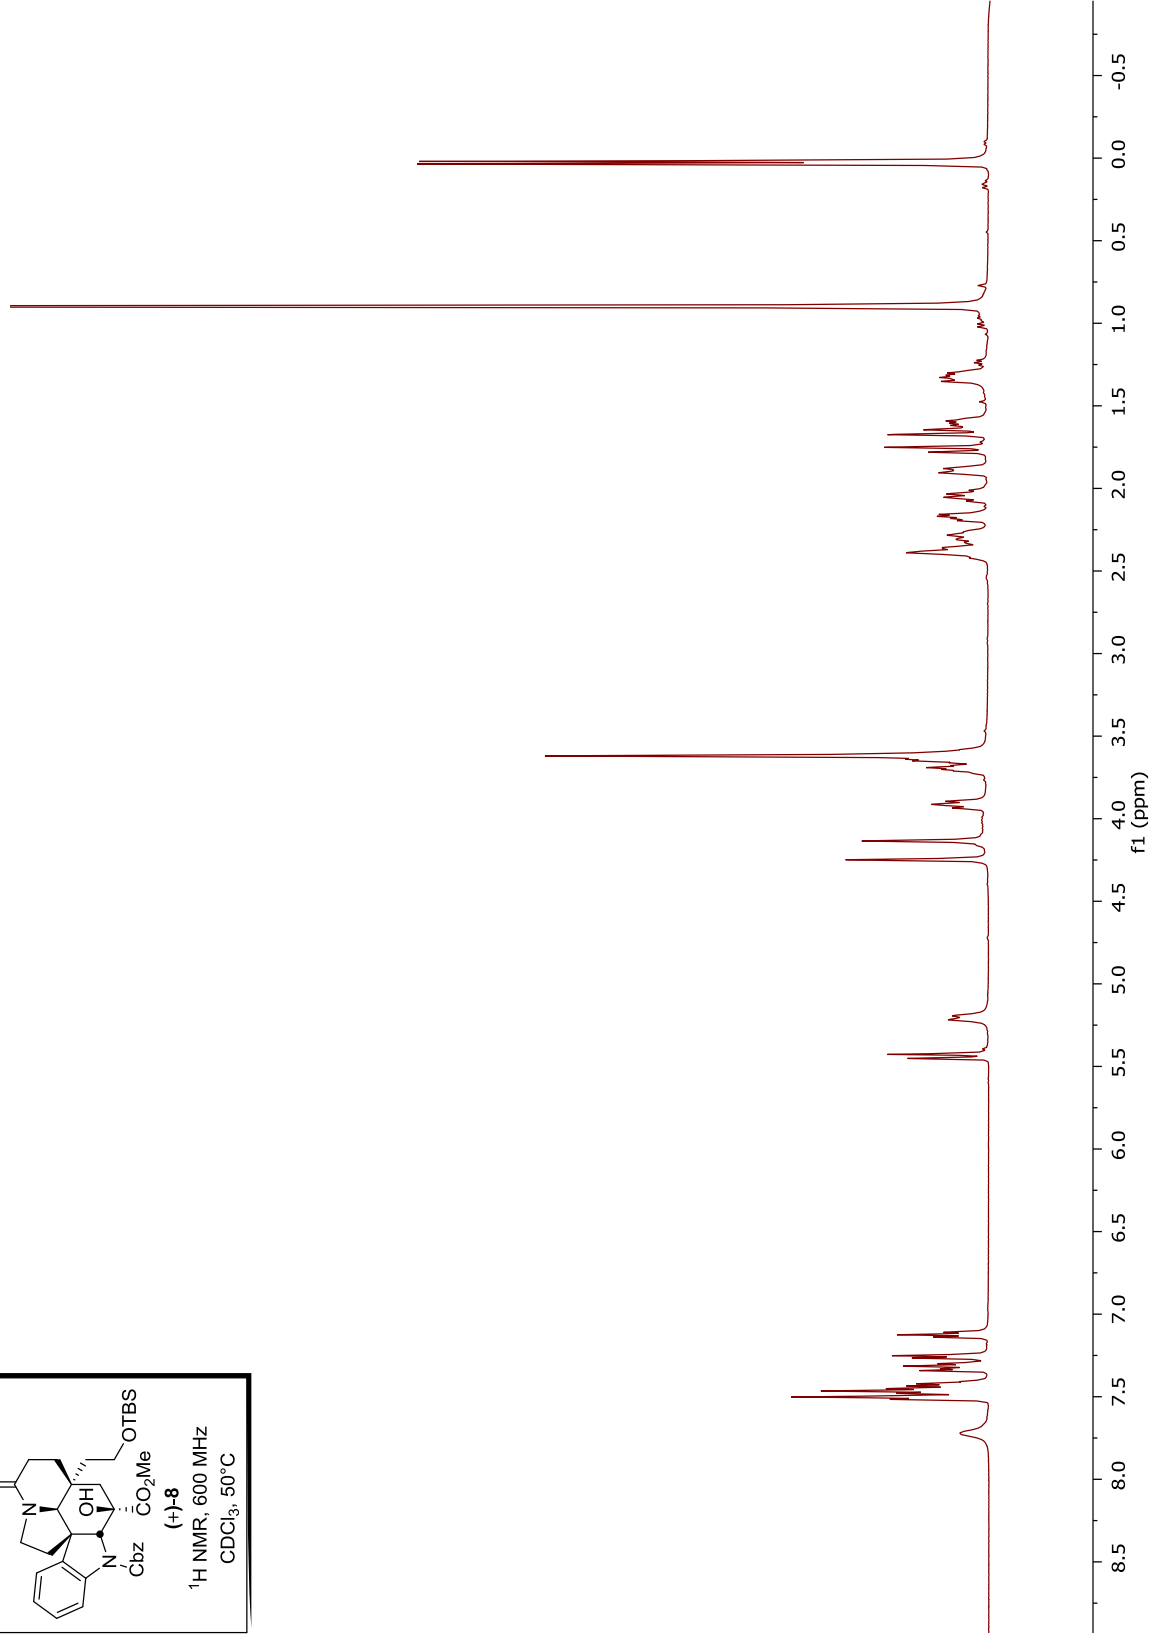

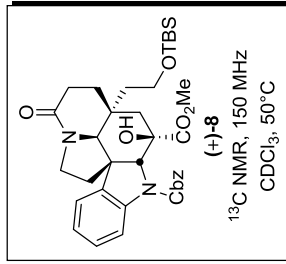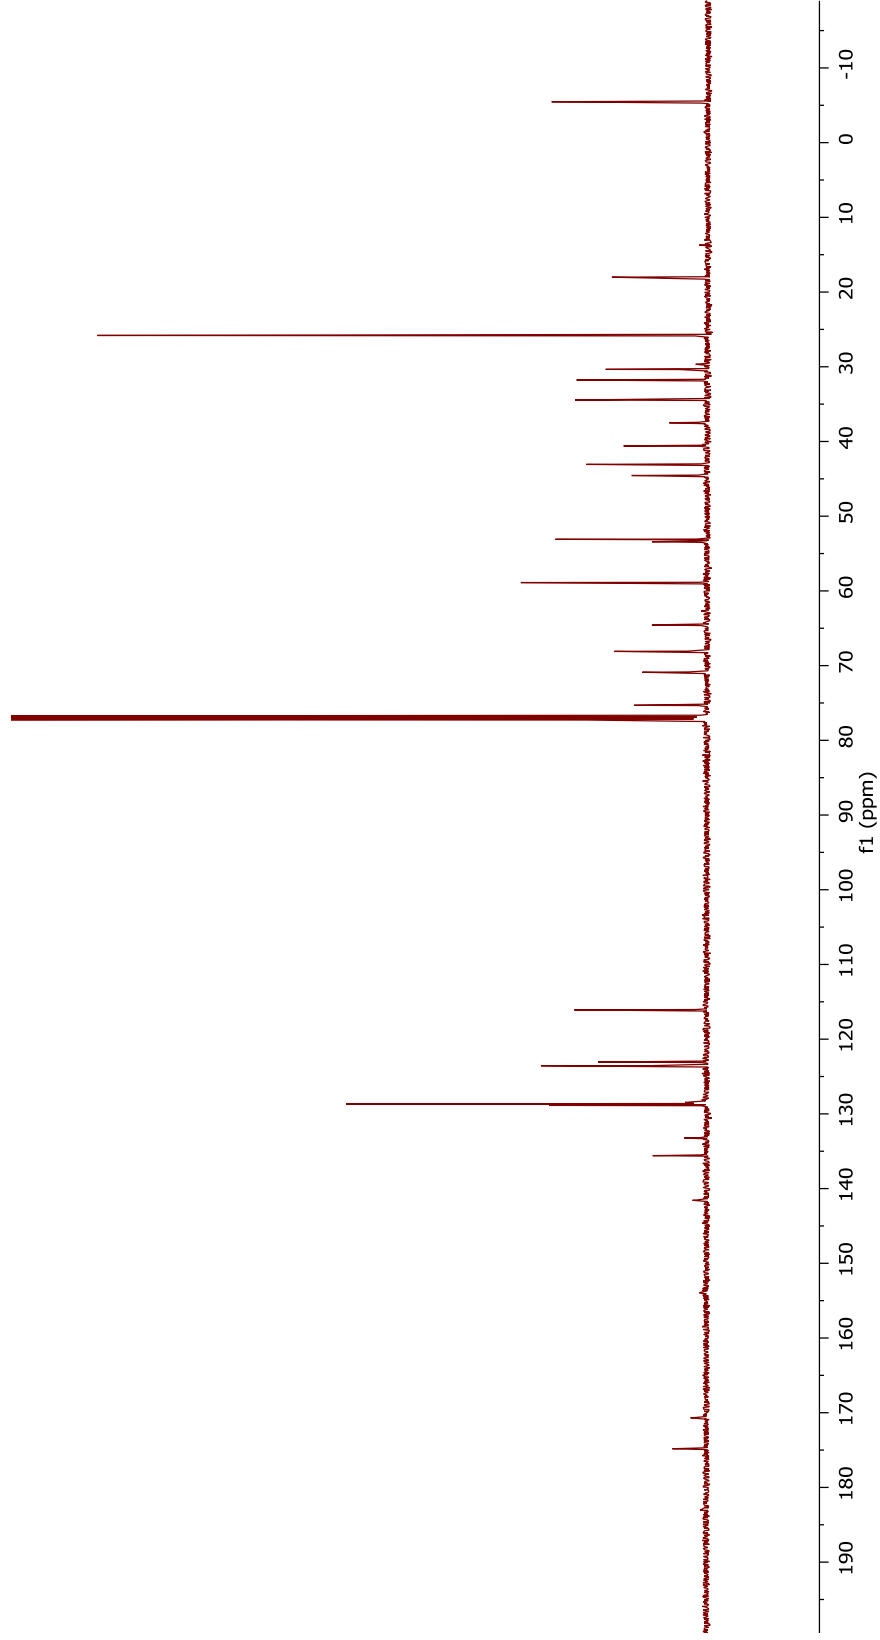

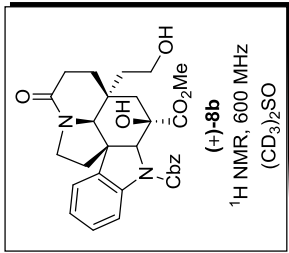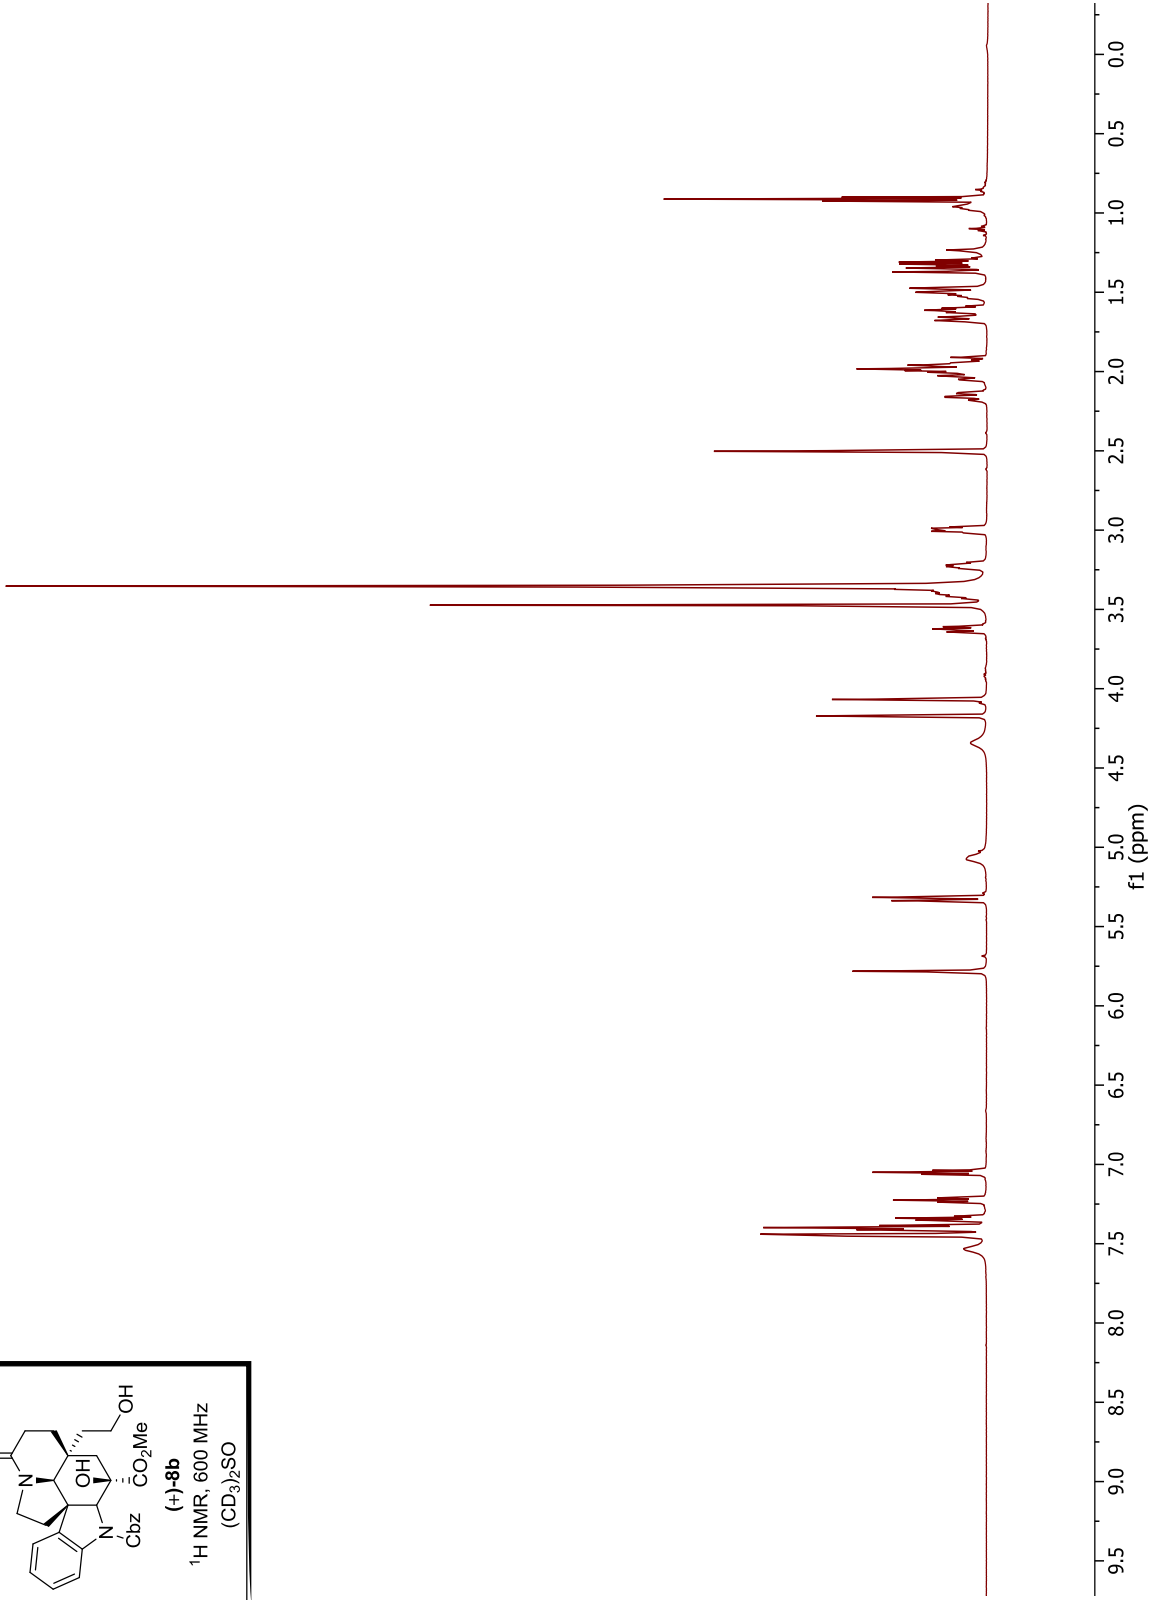



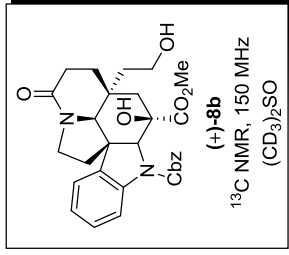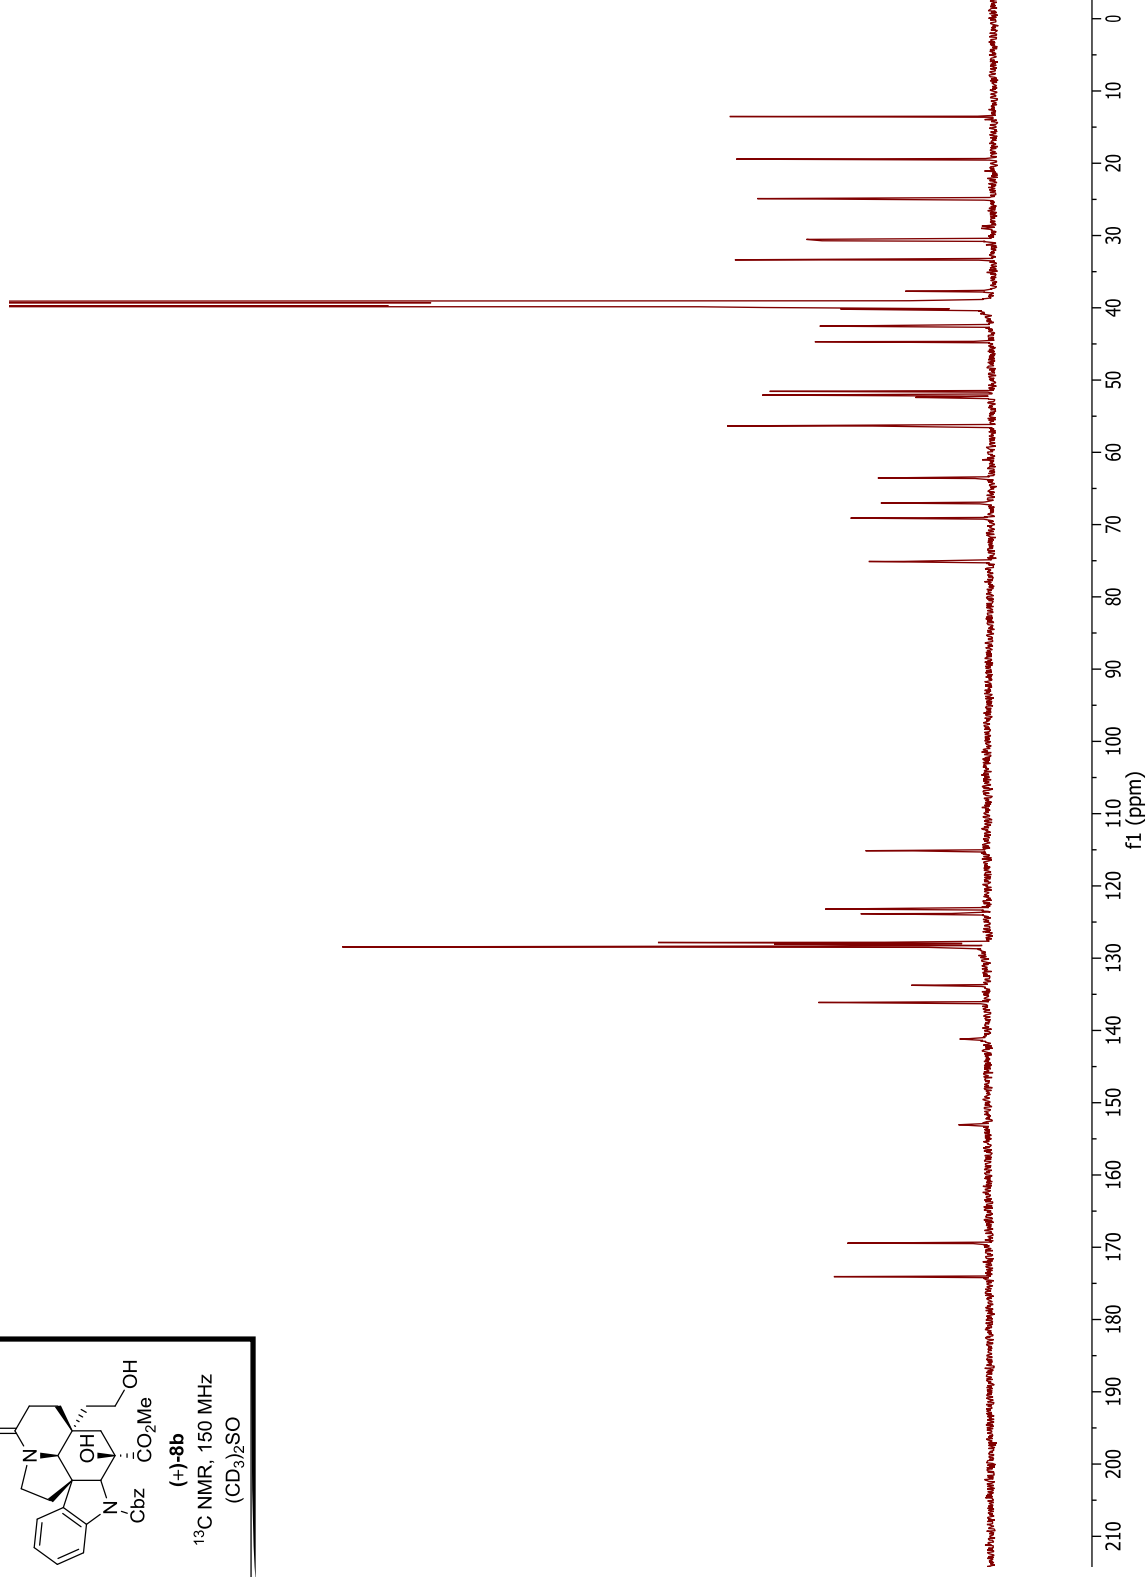

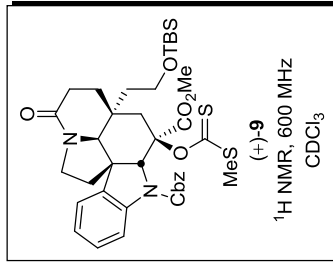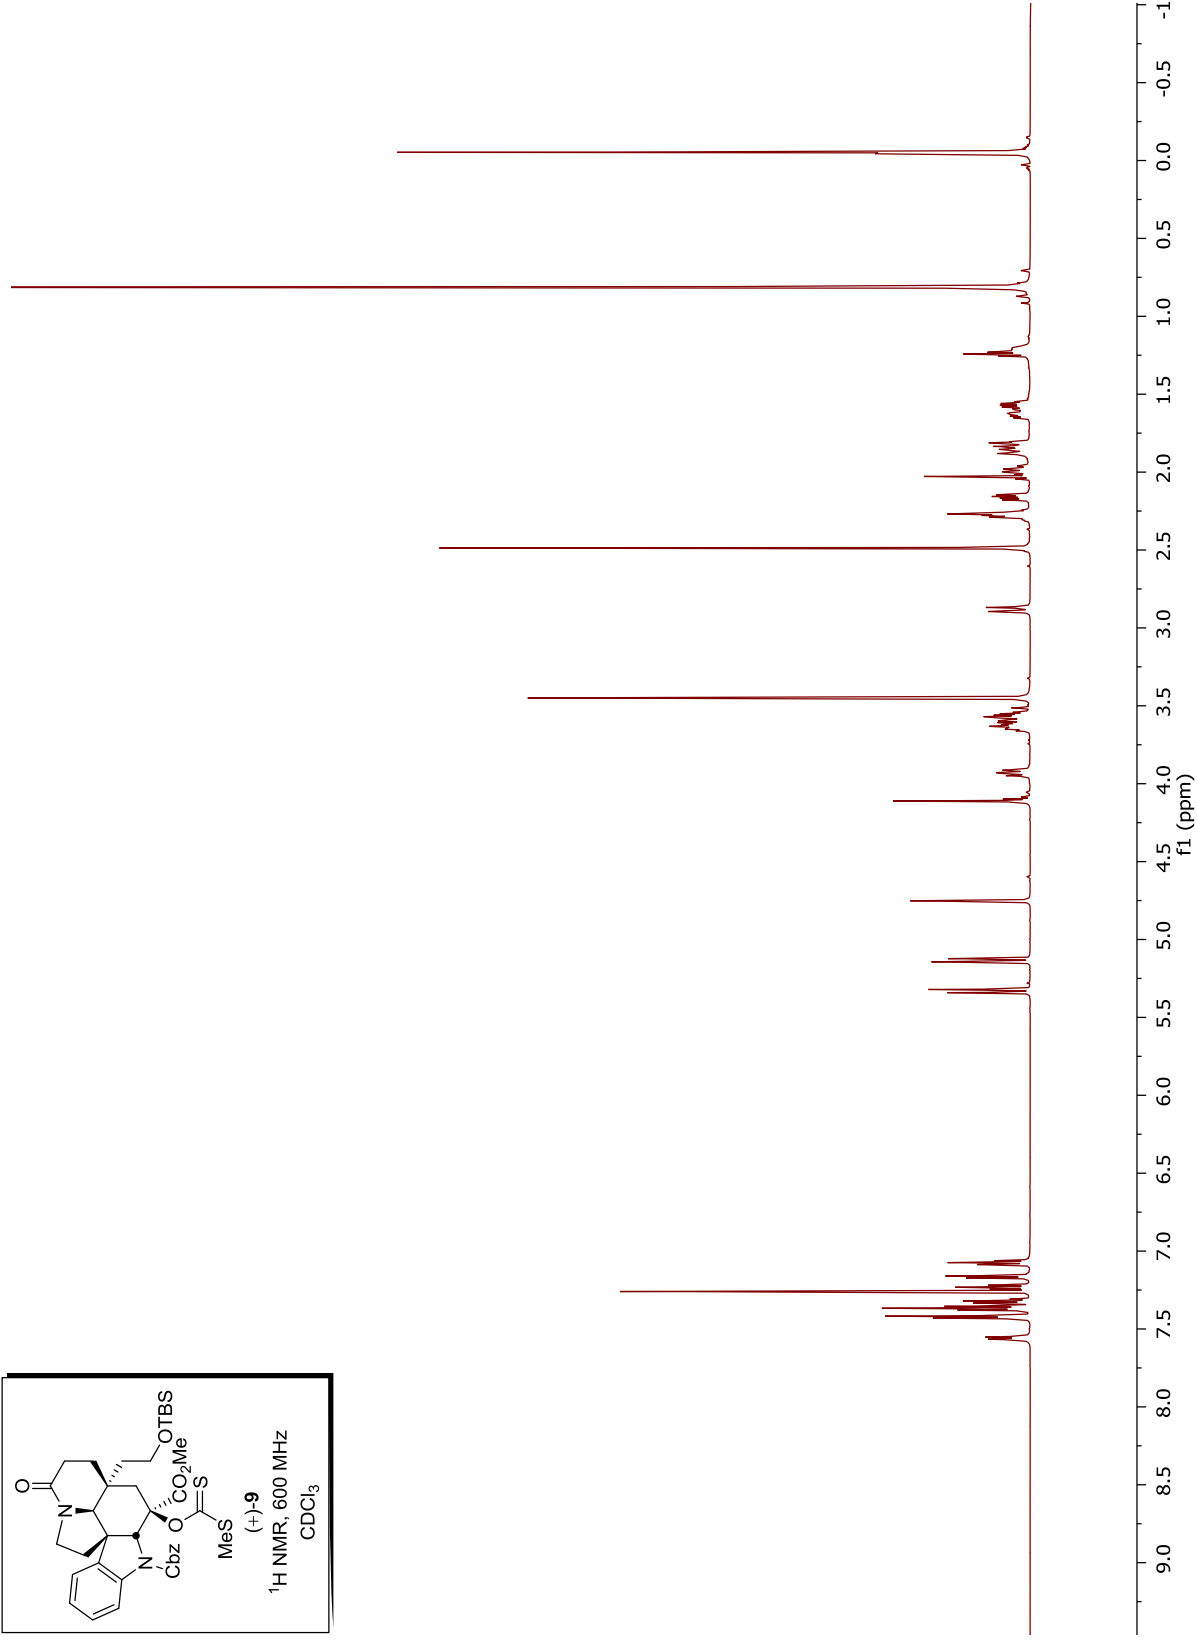

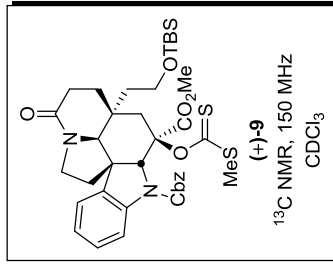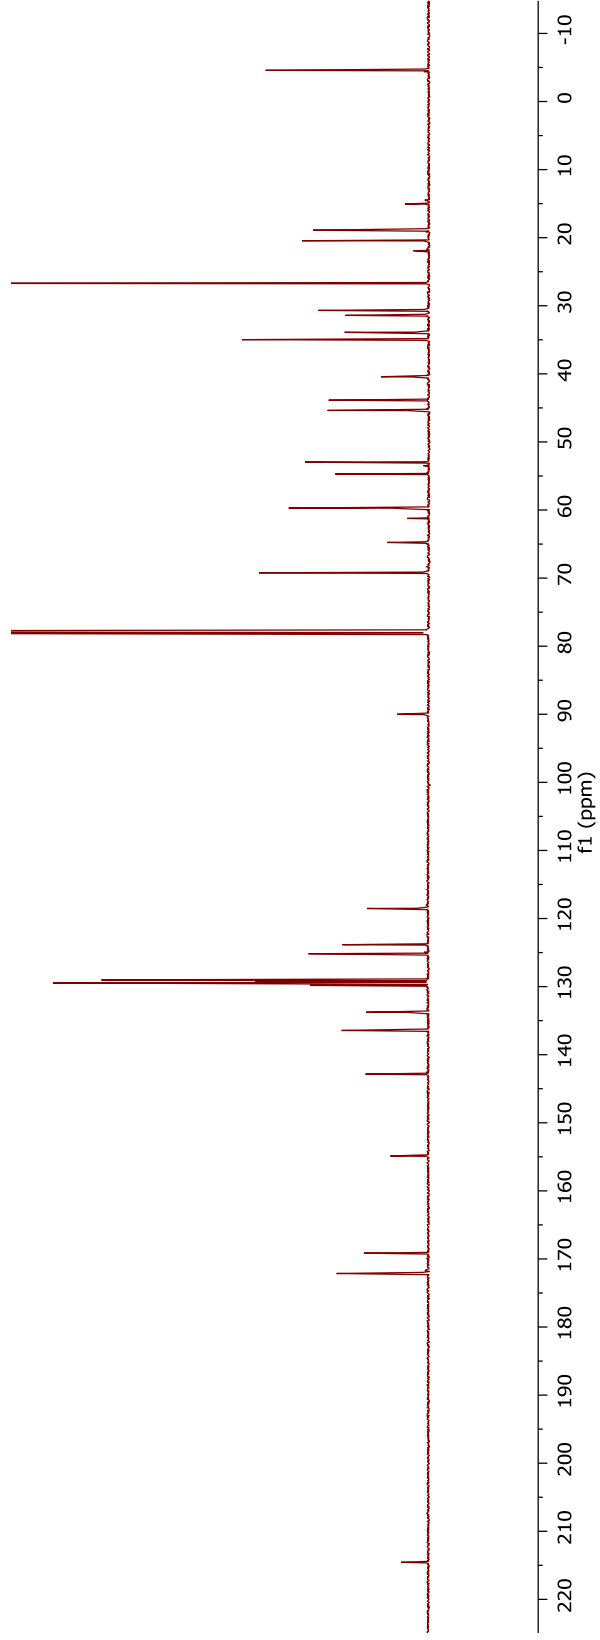

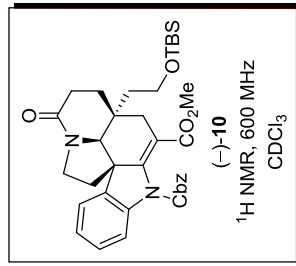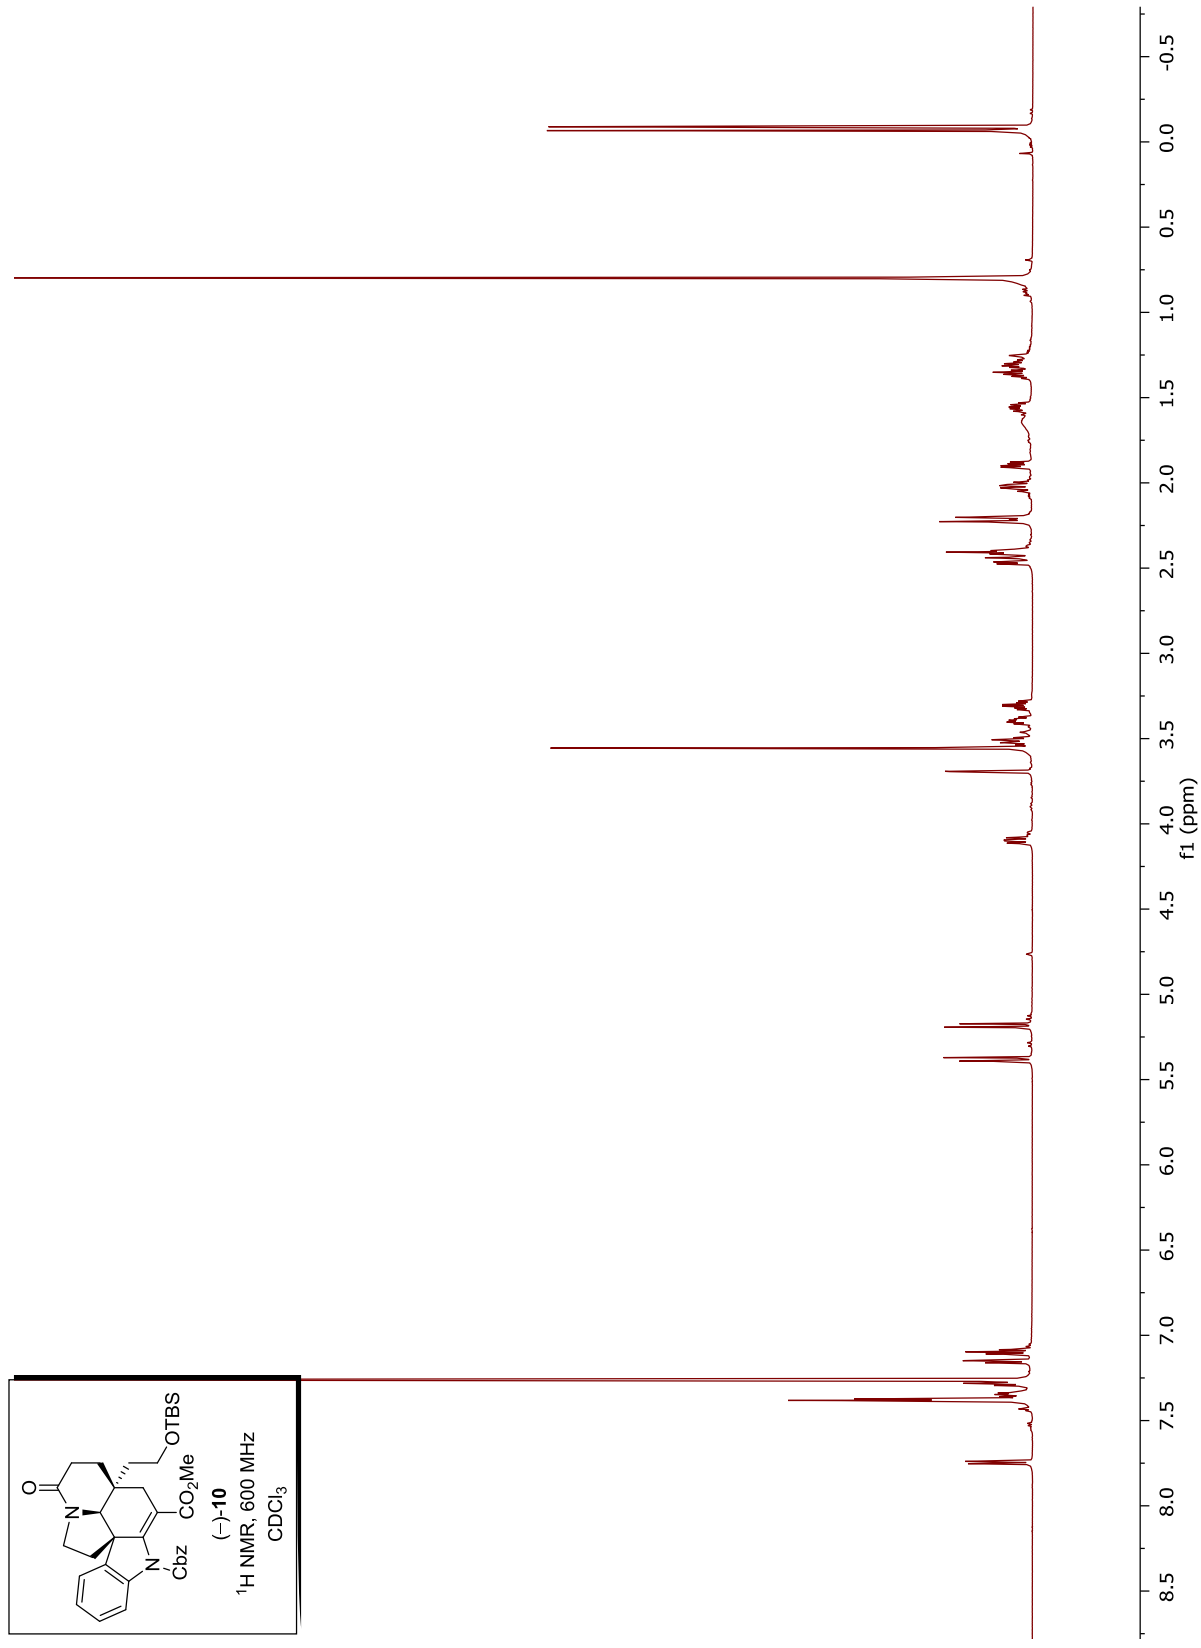

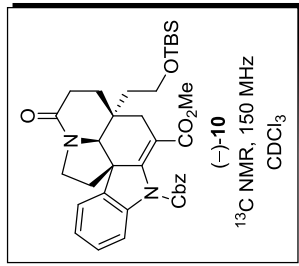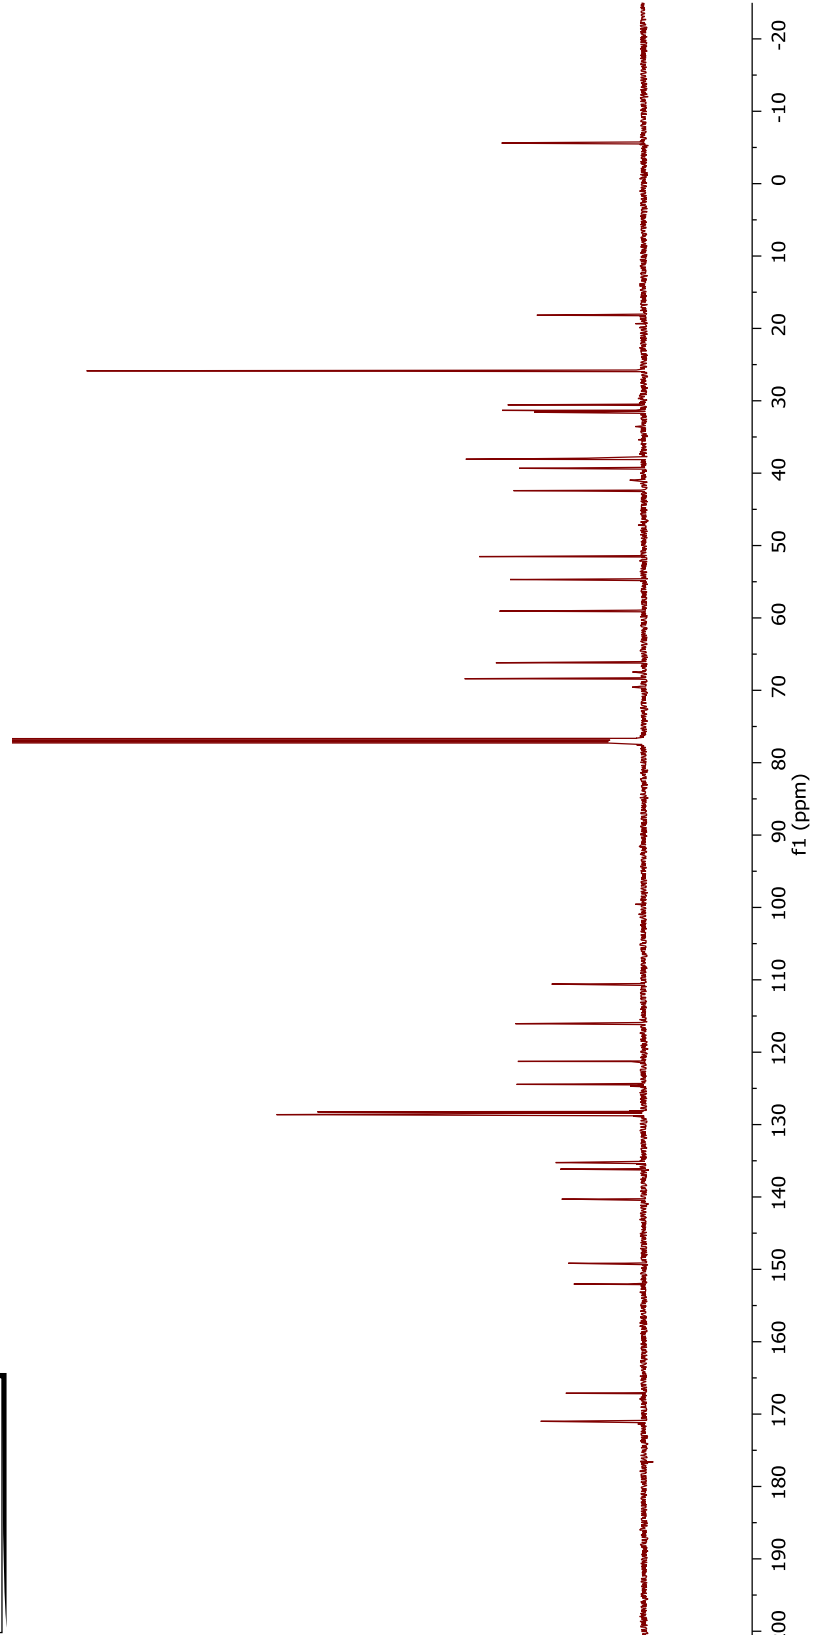

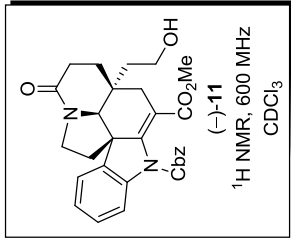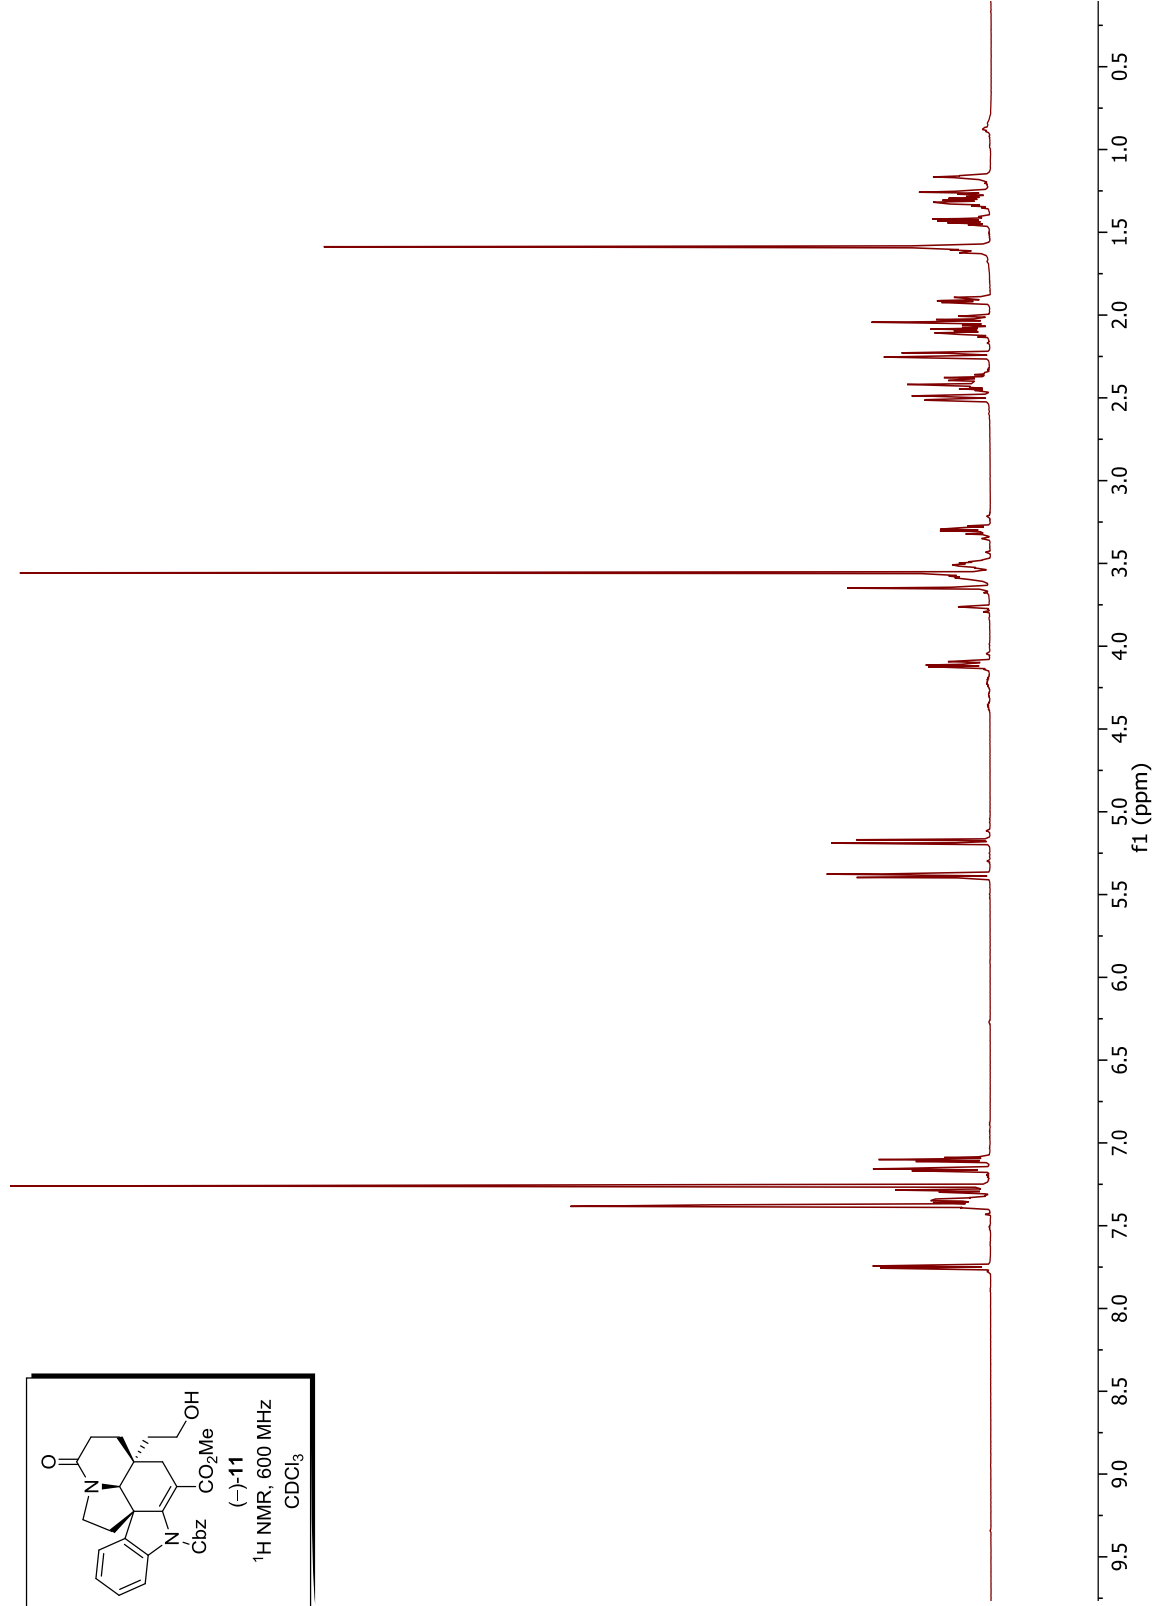

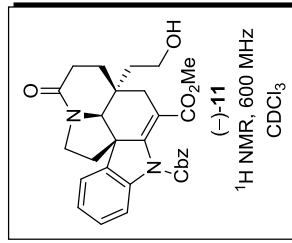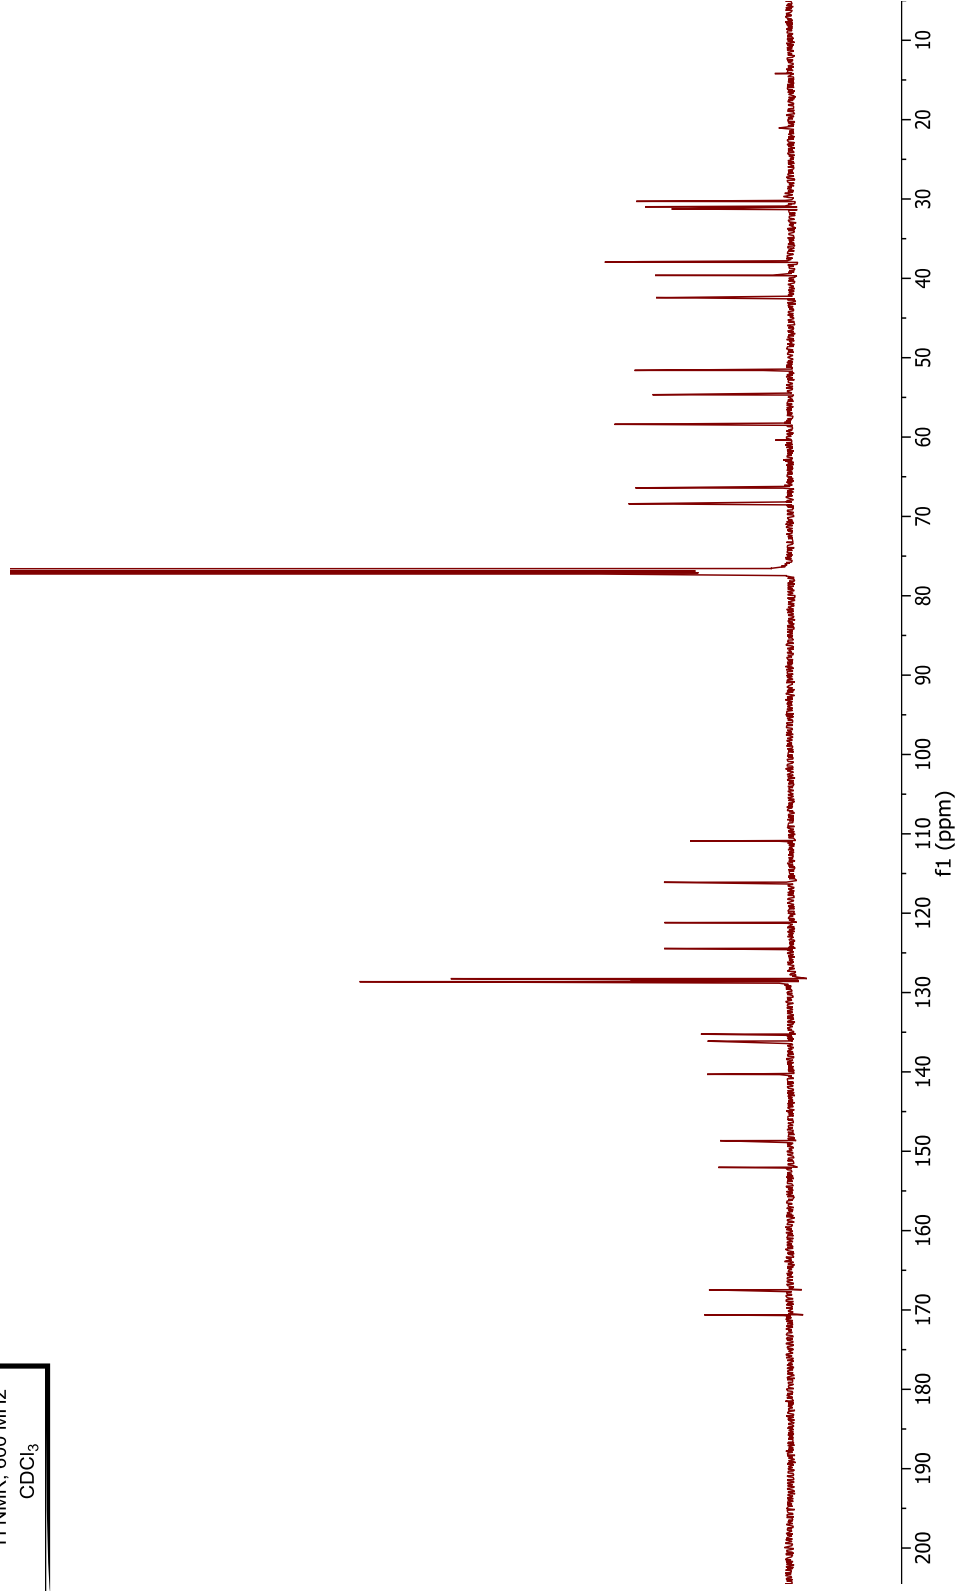

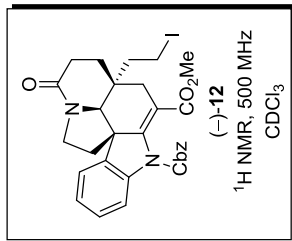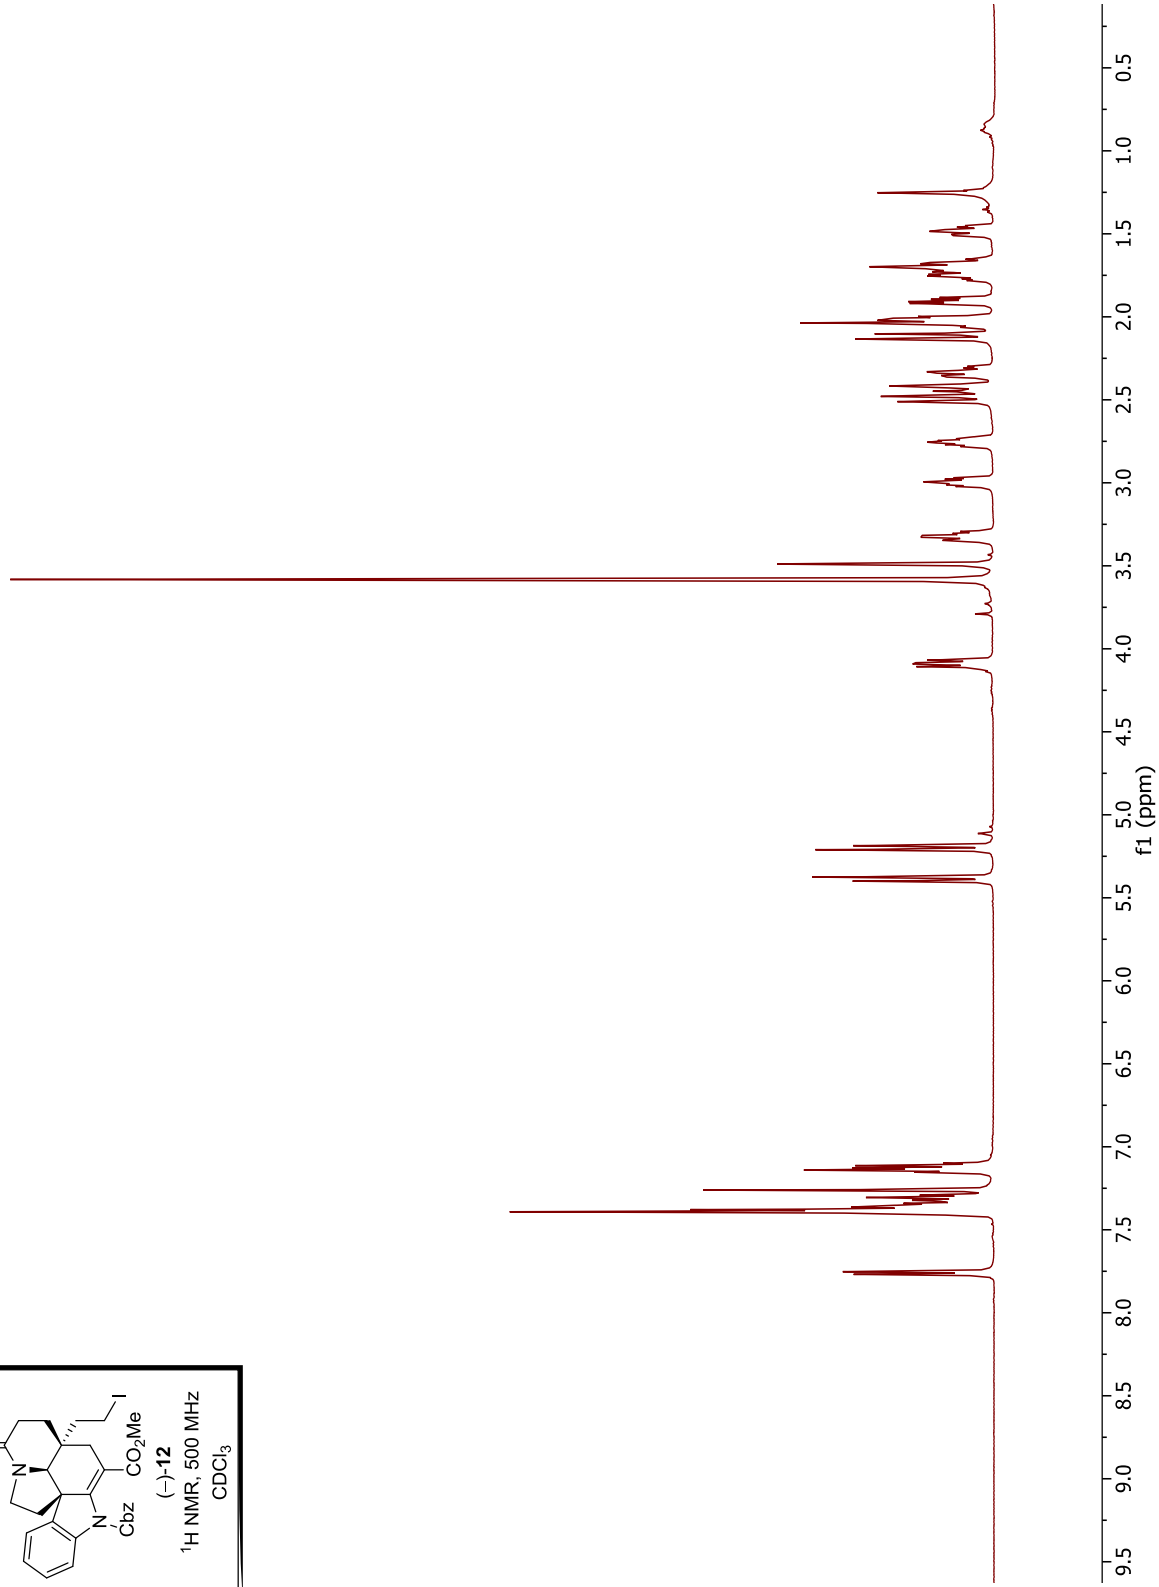



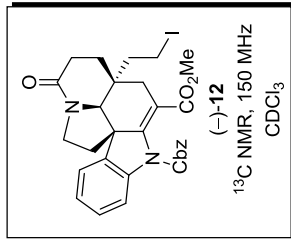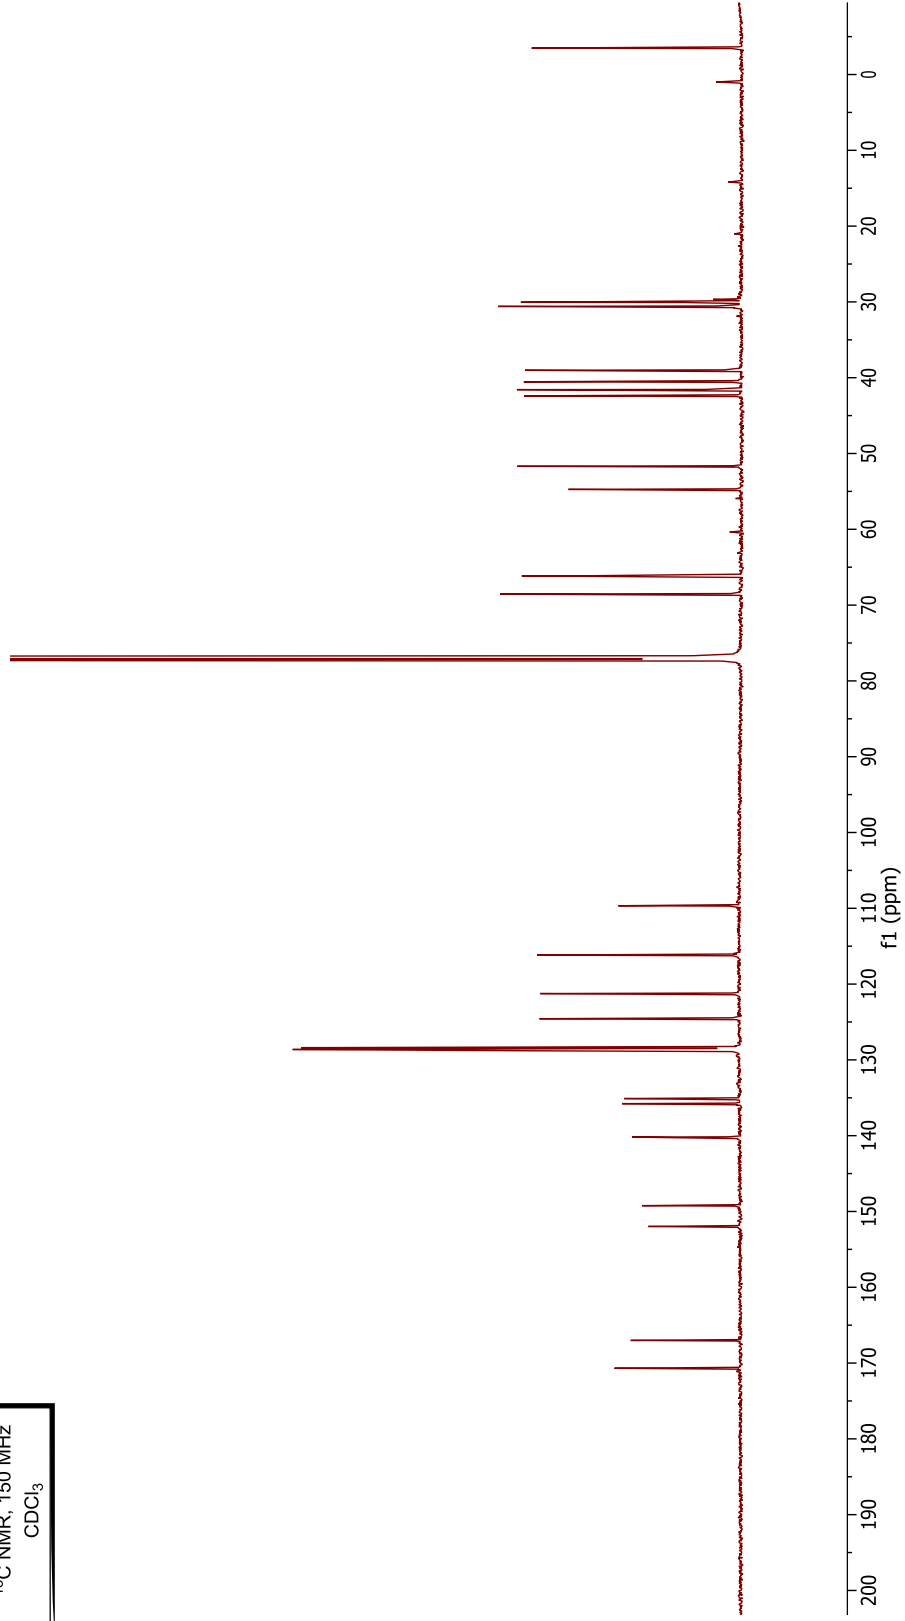

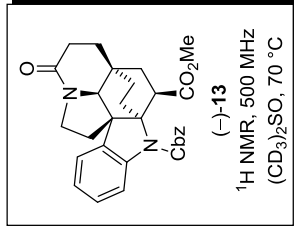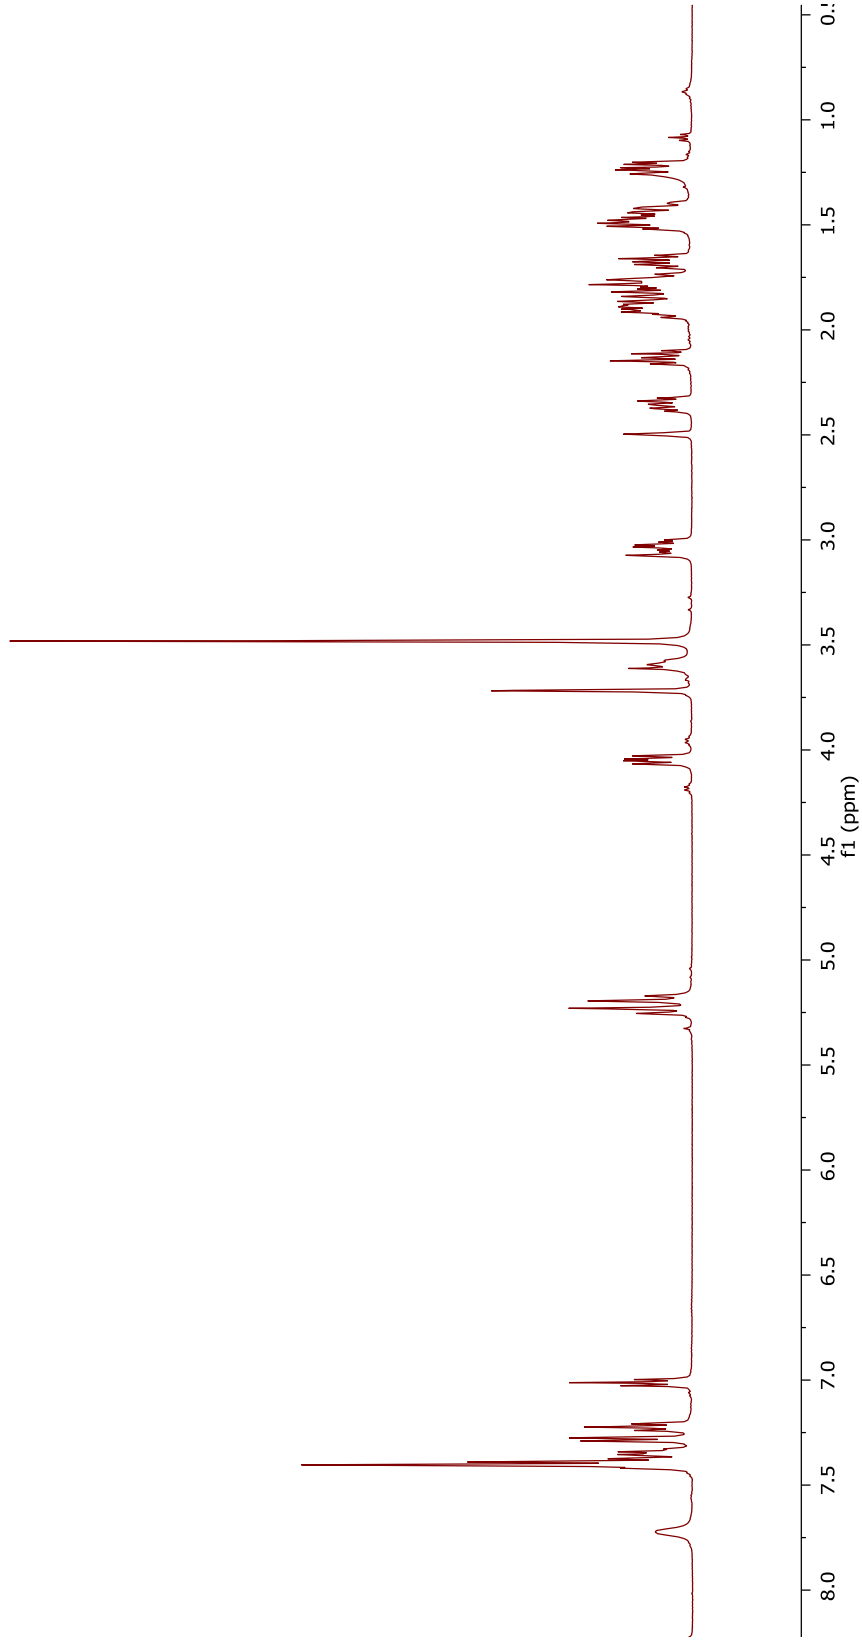

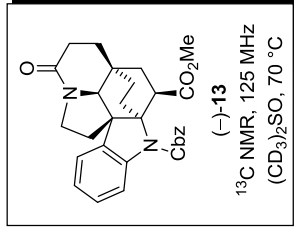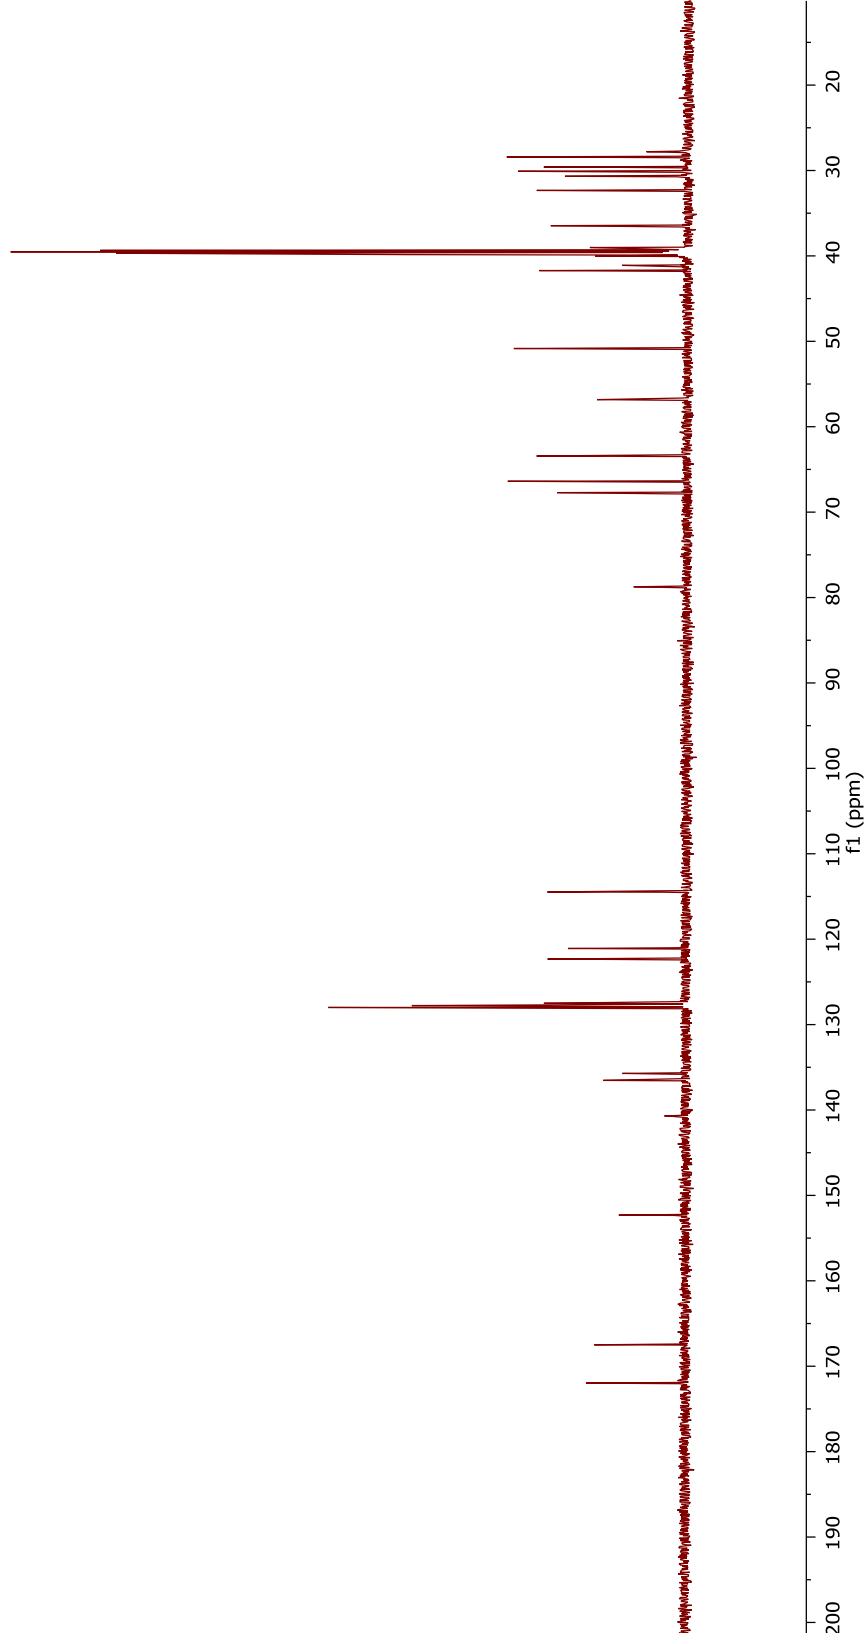

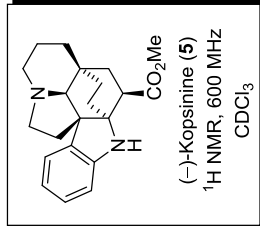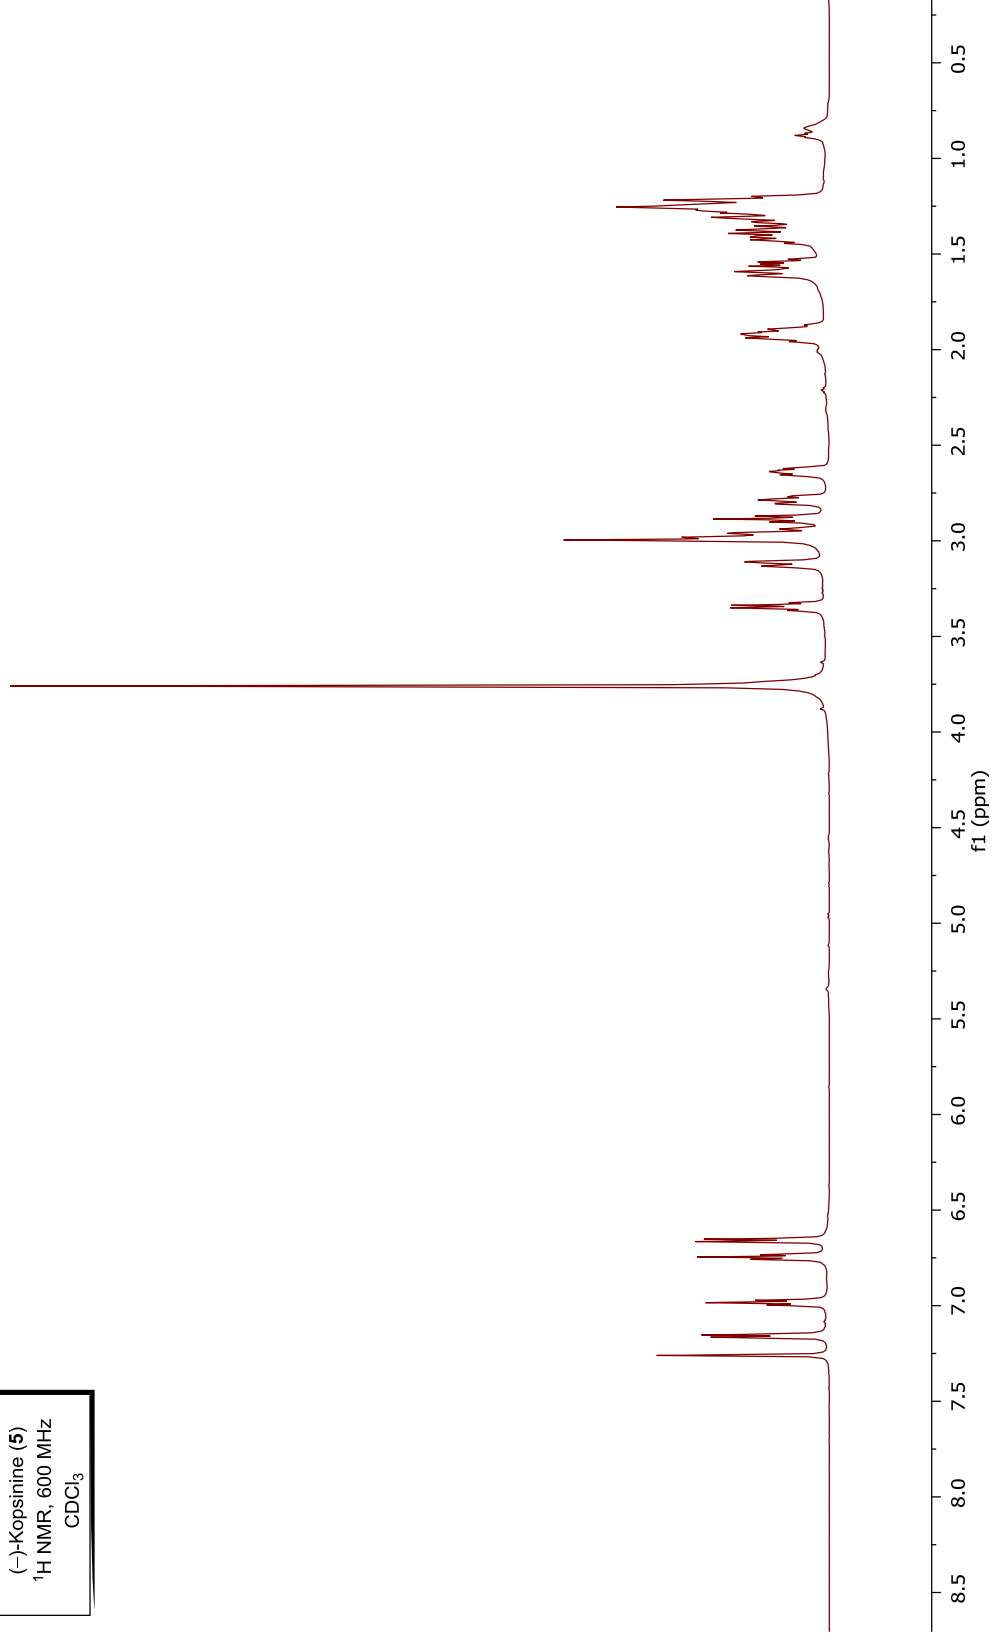



**Synthetic (-)-Kopsinine (5)**

**600 MHz, CDCl<sub>3</sub>**

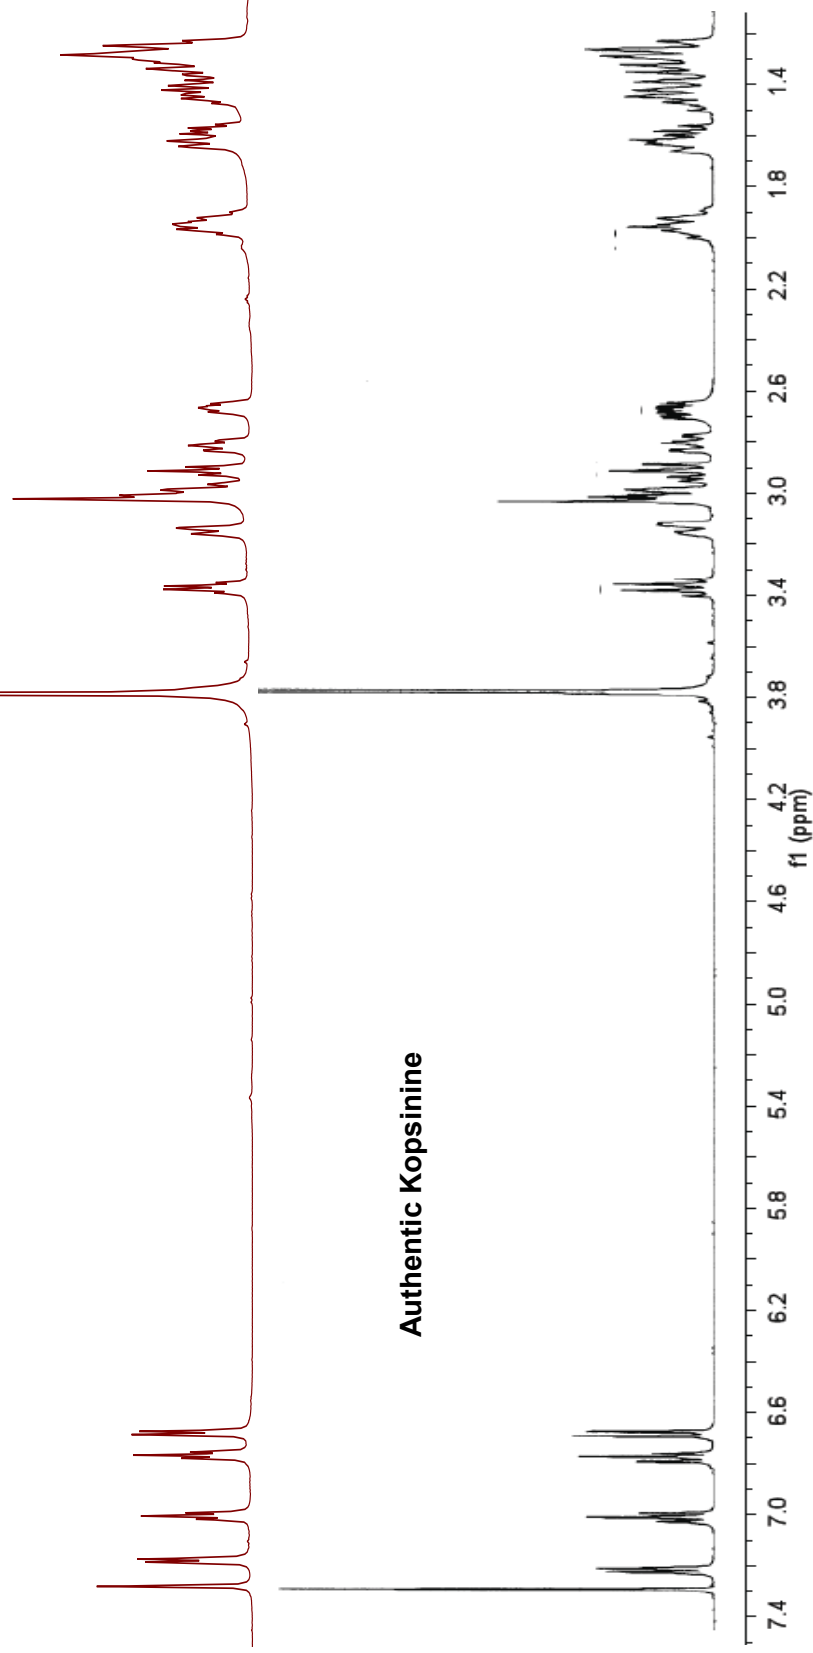

**Authentic Kopsinine**

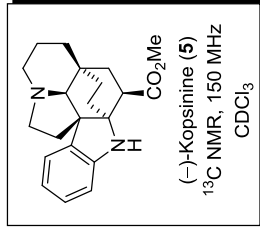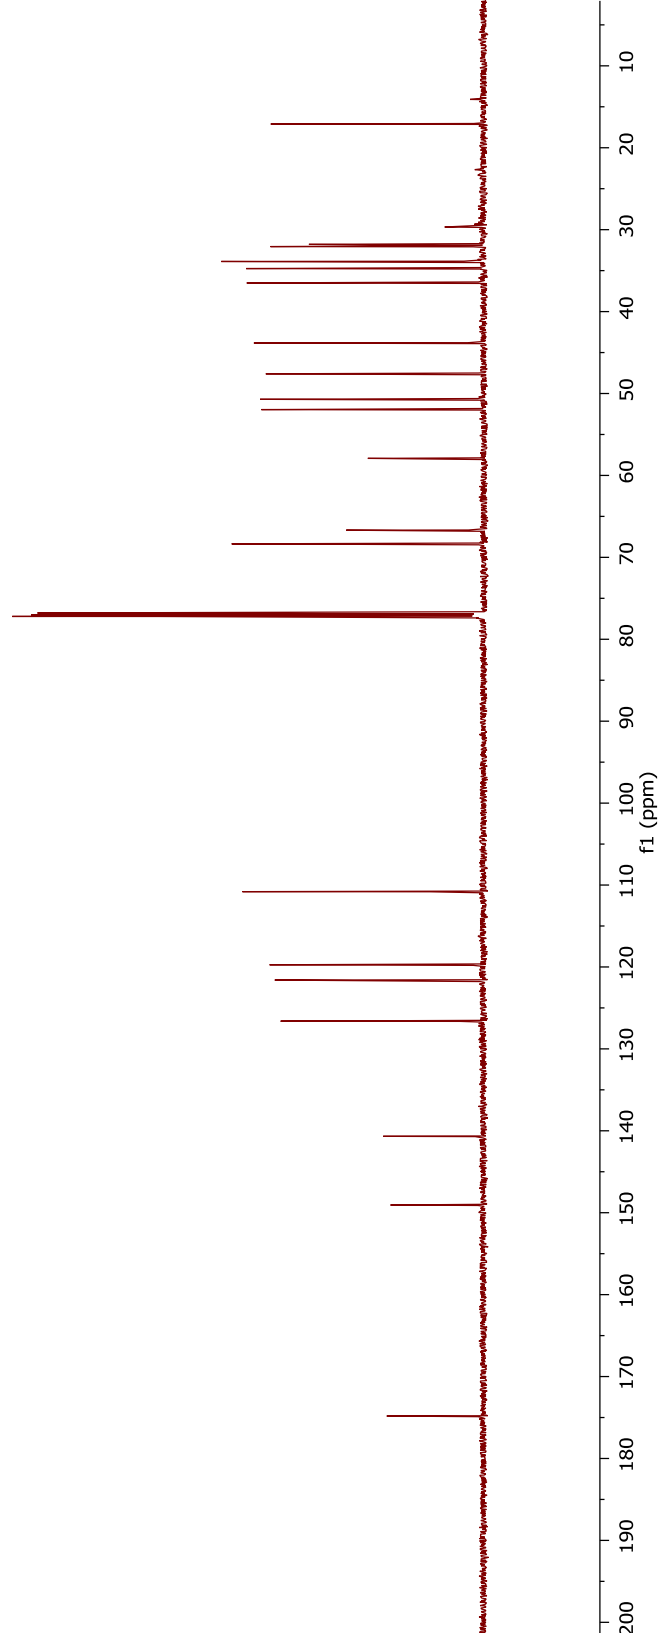

Supplement: NIHMS618806-supplement-01.pdf [file NIHMS618806-supplement-01.pdf]
